# Supplementary material for: Release of extraction-resistant mRNA in stationary phase Saccharomyces cerevisiae produces a massive increase in transcript abundance in response to stress
Source: PubMed Central journal article supplement (PMC1431719; doi:10.1186/gb-2006-7-2-r9), 2006-02-08

**Correlation Between Biological and Technical Replicates.** To evaluate reproducibility of our experimental technique as well as between  $T_0$  samples, a statistical measurement model was generated from microarray data from six independent  $T_0$  samples. The measurement model represents the observed  $\log_2(R/G)$  values in terms of specific effects due to gene, culture, and replicate. Let  $Y_{ijk}$  denote the measured  $\log_2(R/G)$  value of the  $i^{\text{th}}$  gene for the  $k^{\text{th}}$  replicate slide within the  $j^{\text{th}}$  culture. The model is given by  $Y_{ijk} = \mu_i + \alpha_j + \beta_{k(j)} + \varepsilon_{ijk}$ , where  $\mu_i$  represents the underlying true/idealized (but unknown) value of the log-ratio for the  $i^{\text{th}}$  gene,  $\alpha_j$  denotes a global effect (across all genes) that is present during the measurement of slides from the  $j^{\text{th}}$  culture,  $\beta_{k(j)}$  denotes an effect on the measurement (across all genes) associated with the  $k^{\text{th}}$  replicate slide within the  $j^{\text{th}}$  culture, and  $\varepsilon_{ijk}$  represents the specific effect of the  $k^{\text{th}}$  replicate slide within the  $j^{\text{th}}$  culture on the  $i^{\text{th}}$  gene. The  $i^{\text{th}}$  gene is said to be up-regulated or down-regulated (treatment versus control) if the estimate of  $\mu_i$  ( $\hat{\mu}_i$ ) is significantly different than zero. Examination of  $\mu_i$  shows data between 1 and -1  $\log_2$  demonstrating no significant differences between the  $T_0$  samples (Fig. 1A).

The other effects ( $\alpha_j$ ,  $\beta_{k(j)}$ , and  $\varepsilon_{ijk}$ ) are regarded as random measurement errors and thus hinder the ability to determine whether a gene is up- or down-regulated. In this case, the  $\alpha_j$  effects are relatively large ( $\hat{\sigma}_\alpha = 0.57$ ) and are possibly a consequence of unique PMT settings for each culture. The  $\beta_{k(j)}$  effects are smaller ( $\hat{\sigma}_\beta = 0.08$ ). In combination, the  $\alpha_j$  and  $\beta_{k(j)}$  effects introduce a specific global shift (across all genes) in log-ratios for each slide when comparing  $T_0$  measurements averaged from culture two versus averaged from culture one (Fig. 1B). Presumably, these global effects can be effectively removed via

proper normalization. The other measurement error ( $\varepsilon_{ijk}$ ) is gene-specific and much smaller than the  $\alpha_j$  and  $\beta_{k(j)}$  effects. A LOWESS smooth [54] of the raw standard deviations suggests that  $\hat{\sigma}_\varepsilon$  is about 0.30 when  $|\hat{\mu}| \geq 1$  (Fig. 1C). Thus, disregarding the  $\alpha_j$  and  $\beta_{k(j)}$  effects, any change greater than 1.6 fold can be viewed as statistically significant with a Type I error (or false positive rate) of about 0.01.

**Fig 1.** (A) Histogram of estimated values of  $\mu \log_2$  ratio. (B) Mean  $\log_2$  ratio of culture 2 (C2) slides versus culture 1 (C1) slides (replicate  $T_0$  samples). (C) Standard deviation of the  $\varepsilon_{ijk}$ 's as a function of  $\hat{\mu}_i$  across the various genes with LOWESS smooth.

#### References

54. Cleveland WS: **Robust Locally Weighted Regression and Smoothing Scatterplots.** *Journal of the American Statistical Association* 1979, **74**(368):829-836.

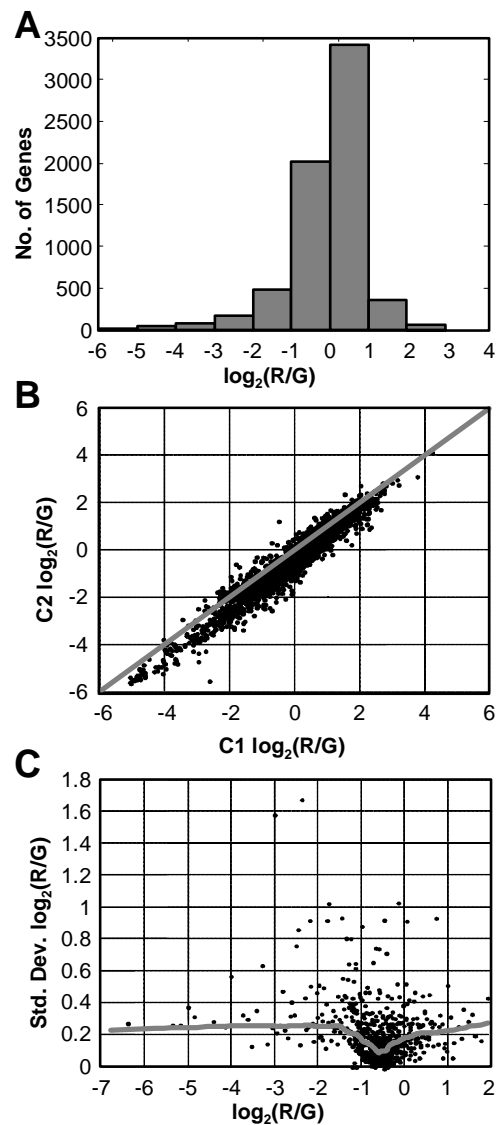

Supplement: gb-2006-7-2-r9-S11.pdf [file gb-2006-7-2-r9-S11.pdf]
