# Supplementary material for: Release of extraction-resistant mRNA in stationary phase Saccharomyces cerevisiae produces a massive increase in transcript abundance in response to stress
Source: PubMed Central journal article supplement (PMC1431719; doi:10.1186/gb-2006-7-2-r9), 2006-02-08

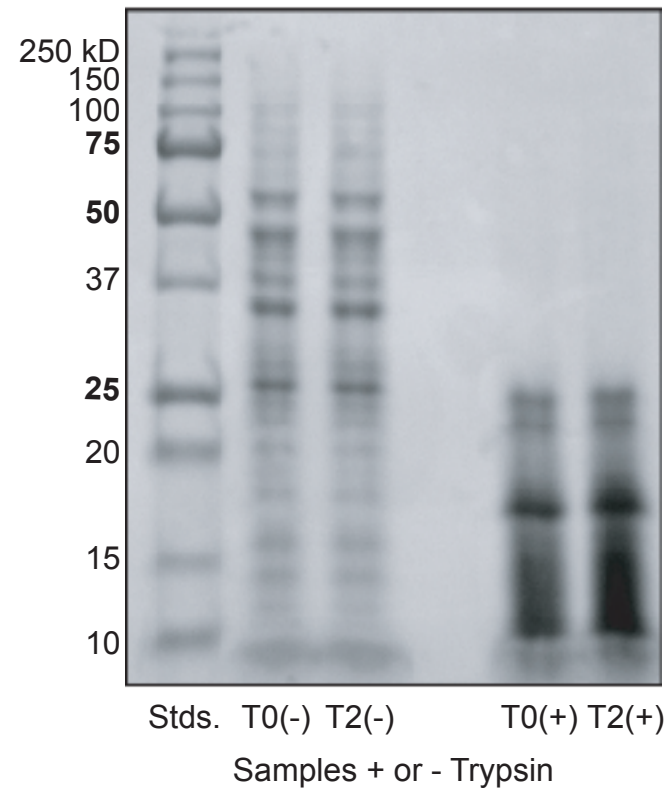

Samples Stationary Phase (SP) or Exponential (EX)  
+ or – Trypsin (T), or Qiagen Protease (P), or Proteinase K (K)

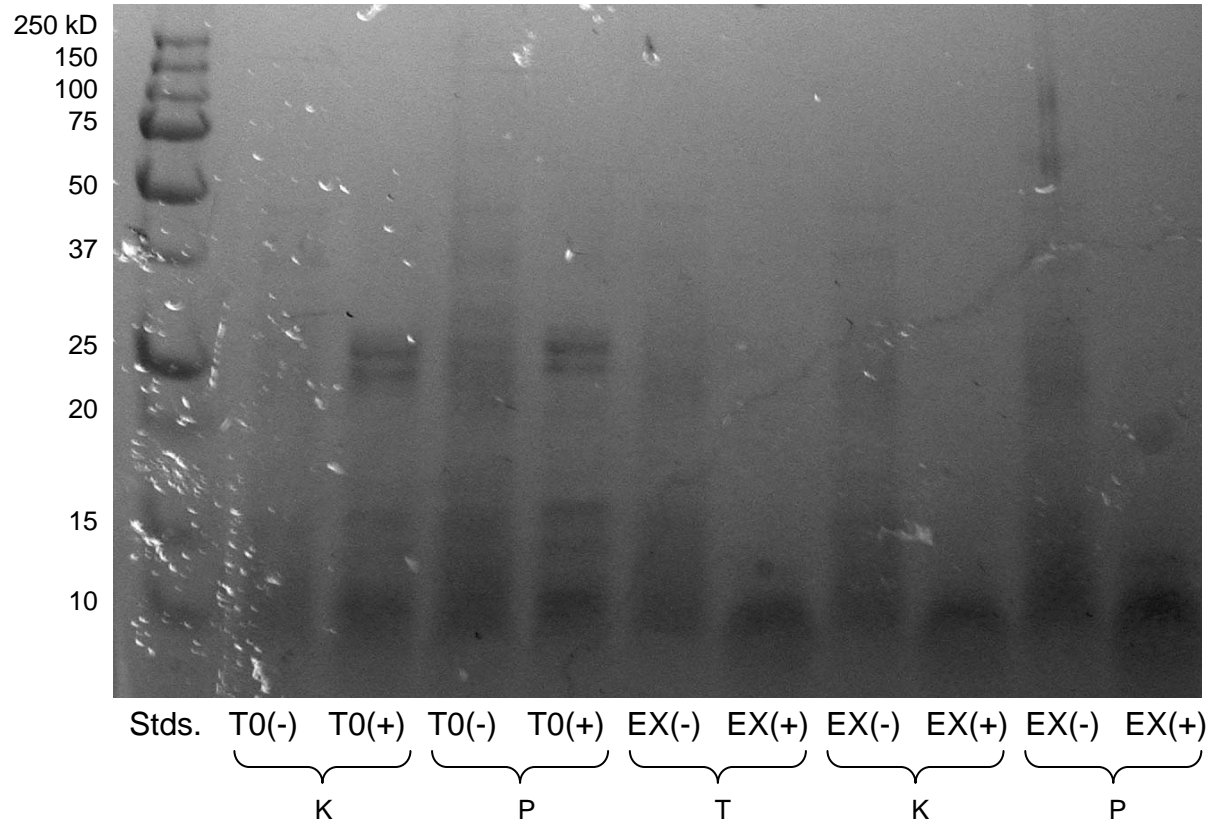

Supplement: gb-2006-7-2-r9-S4.pdf [file gb-2006-7-2-r9-S4.pdf]
