# Supplementary material for: Release of extraction-resistant mRNA in stationary phase Saccharomyces cerevisiae produces a massive increase in transcript abundance in response to stress
Source: PubMed Central journal article supplement (PMC1431719; doi:10.1186/gb-2006-7-2-r9), 2006-02-08
Supplement: gb-2006-7-2-r9-S12.pdf [file gb-2006-7-2-r9-S12.pdf]

## RT-PCR Protocol

### RT

| <u>Components for cDNA synthesis</u> | <b>Final volume</b><br><b>8.7 µL</b> | <b>3X RXN.</b><br><b>Final volume</b><br><b>26.1 µL</b> | <b>Final amount</b> |
|--------------------------------------|--------------------------------------|---------------------------------------------------------|---------------------|
| RNA (250ng/ul)                       | 2 µL of dilution                     | 6 µL of dilution                                        | 500 ng              |
| Exogenous RNA Control (Cab)          | 1 µL (10 ng/µl)                      | 1 µL (10 ng/µl)                                         | 10 ng               |
| Random Hexamers (50µM)               | 1 µL                                 | 3 µL                                                    | 2.5 µM              |
| RNase free water                     | 4.7 µL                               | 16.1 µL                                                 | -----               |

Run the above samples on the **Thermocycler** using program **CMT**

|             | <b>Temperature</b> | <b>Time</b> | <b>Reaction</b>                  |
|-------------|--------------------|-------------|----------------------------------|
| <b>CMT:</b> | 70°C               | 10 minutes  | Denaturation of template RNA     |
|             | 4°C                | 5 minutes   | <b>PAUSE: Add Master Mix!!!!</b> |
|             | 23°C               | 10 minutes  | Annealing of primer to RNA       |
|             | 42°C               | 2 hour      | Extension of cDNA chain          |
|             | 4°C                | hold        |                                  |

| <u>Final Components</u>                     | <b>Final volume</b><br><b>20 µL</b> | <b>Master Mix =</b><br><b>10 rxns.</b> | <b>Master Mix =</b><br><b>40 rxns.</b> | <b>Final concentration</b> |
|---------------------------------------------|-------------------------------------|----------------------------------------|----------------------------------------|----------------------------|
| 10X TaqMan RT Buffer                        | 2 µL                                | 20 µL                                  | 80 µL                                  | 1X                         |
| 25 mM MgCl <sub>2</sub>                     | 4.4 µL                              | 44 µL                                  | 176 µL                                 | 5.5 mM                     |
| deoxyNTPs Mixture (2.5 mM)                  | 4 µL                                | 40 µL                                  | 160 µL                                 | 500 µM per dNTP            |
| RNase Inhibitor (20 U/L)                    | 0.4 µL                              | 4 µL                                   | 16 µL                                  | 0.4 U/µL                   |
| MultiScribe Reverse Transcriptase (50 U/µL) | 0.5 µL                              | 5 µL                                   | 20 µL                                  | 1.25 U/µL                  |

**\*Add 11.3 µL of Master Mix to each reaction at the 4°C step.**

**\*For 3X RXN. add 33.9 µL of Master Mix to each reaction at the 4°C step.**

Read the amount of cDNA (nucleic acid / W.C.) on the spectrophotometer, once program "CMT" is completed.

(1:50) dilution: (2µL of cDNA + 98µL 10mM Tris HCl pH 7.5)

The Applied Biosciences protocol for SybrGreen RT-PCR suggests 1-10ng of cDNA template and 3  $\mu\text{L}$  of 5 $\mu\text{M}$  [] primers be used per reaction.

I typically make three times the following amounts in one tube, and then aliquot into three wells for triplicate reactions.

### PCR

| Components                                                | For 25 $\mu\text{L}$ total vol. | No Template 25 $\mu\text{L}$ |
|-----------------------------------------------------------|---------------------------------|------------------------------|
| 2X SYBR green PCR master mix                              | 12.5 $\mu\text{L}$              | 12.5 $\mu\text{L}$           |
| Forward & Reverse Primers together (5 $\mu\text{M}$ each) | 3.0 $\mu\text{L}$               | 3.0 $\mu\text{L}$            |
| cDNA template (1-10 ng/ $\mu\text{L}$ )                   | 1 $\mu\text{L}$                 | None                         |
| DEPC-H <sub>2</sub> O                                     | 8.5 $\mu\text{L}$               | 9.5 $\mu\text{L}$            |

### For multiple reactions:

| Components                                                | For 100 $\mu\text{L}$ total vol. (x 4 wells) | For 250 $\mu\text{L}$ total vol. (x 10 wells) | For 750 $\mu\text{L}$ total vol. (x 30 wells) |
|-----------------------------------------------------------|----------------------------------------------|-----------------------------------------------|-----------------------------------------------|
| 2X SYBR green PCR master mix                              | 50 $\mu\text{L}$                             | 125 $\mu\text{L}$                             | 375 $\mu\text{L}$                             |
| Forward & Reverse Primers together (5 $\mu\text{M}$ each) | 12 $\mu\text{L}$                             | 30 $\mu\text{L}$                              | 90 $\mu\text{L}$                              |
| cDNA template (1-10 ng/ $\mu\text{L}$ )                   | 2 $\mu\text{L}$                              | 10 $\mu\text{L}$                              | 30 $\mu\text{L}$                              |
| DEPC-H <sub>2</sub> O                                     | 36 $\mu\text{L}$                             | 85 $\mu\text{L}$                              | 255 $\mu\text{L}$                             |
